# Supplementary material for: SyMAP v3.4: a turnkey synteny system with application to plant genomes
Source: PubMed Central journal article supplement — Nucleic Acids Res. 2011 Mar 11;39(10):e68. doi: 10.1093/nar/gkr123 (PMC3105427; doi:10.1093/nar/gkr123), 2011-03-11
Supplement: supp_gkr123_nar-02766-met-n-2010-File006.pdf [file supp_gkr123_nar-02766-met-n-2010-File006.pdf]

## Additional material for SyMAP v3.4: Figures S1-S3

**Projects**

**Demo**

- ☐ Demo-FPC

**Poaceae**

- ☒ Maize v2.0
- ☒ Rice
- ☒ SorghumMasked
- ☐ Maize v2.0 NoMask
- ☐ Sorghum

**Summary**

**Maize v2.0** [Remove](#) [Reload annotation](#)  
 Database Name: maizev2  
 Chromosomes: 10  
 Description: Downloaded from maizesequence.org (masked version)

**Rice** [Remove](#) [Reload annotation](#)  
 Database Name: rice  
 Chromosomes: 12  
 Description: MSU 6.1

**SorghumMasked** [Remove](#) [Reload annotation](#)

**Available Alignments**  
 The table below shows which projects have been aligned against each other.  
 'X' indicates that the projects have been completely aligned and loaded.  
 '?' indicates that the projects have been partially aligned.  
 '-' indicates that the projects can't be aligned.

|           | maizev2 | rice | sorg_mask |
|-----------|---------|------|-----------|
| maizev2   | ?       |      |           |
| rice      | X       | X    |           |
| sorg_mask | X       | X    | X         |

Select a pair from the table

[Remove](#) [Align](#) [Whole genome Dot Plot](#)

Or, choose an option below to automatically perform alignments.

[Do uncompleted alignments](#) [Redo all alignments](#)

Or, choose an option below to view ALL SPECIES from the table.

[Chromosome 3D and 2D](#) [Whole Genome Dot Plot](#)

**Figure S1: The SyMAP project manager.** The ‘X’ in each cell of the matrix indicates that the genome pair have been aligned. Selecting a cell allows the pair to be removed, re-aligned or displayed. Selecting the “3D” or “Dot Plot” shows all projects in the respective view. If there is not an ‘X’ in a cell, it can be selected to be aligned.

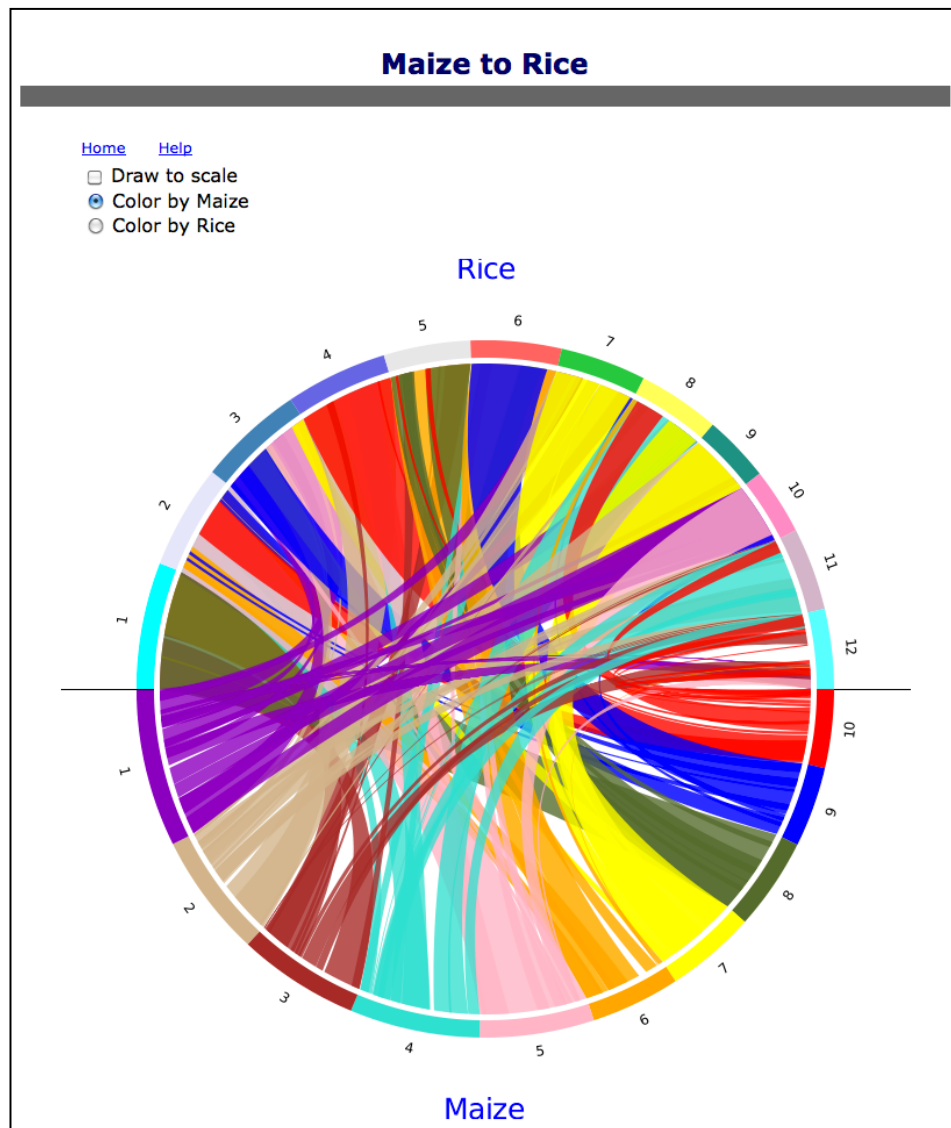

**Figure S2. SyMAP Perl/CGI views. (A) Whole genome circle view**

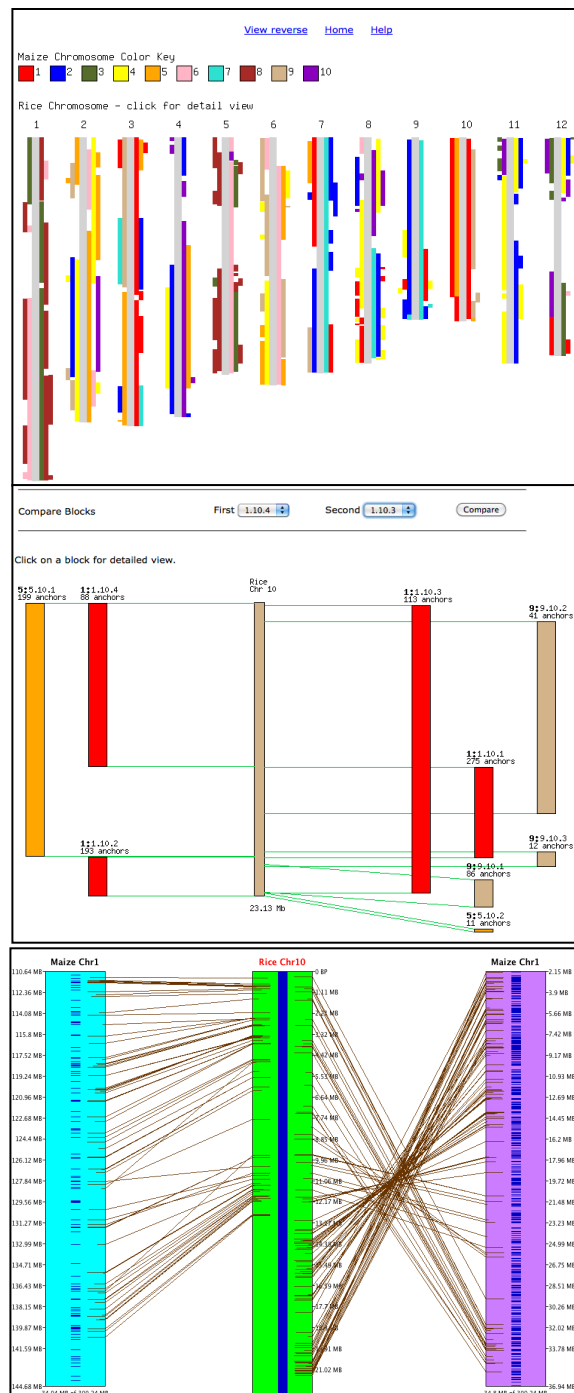

*Block view of two genomes.*  
This shows the alignment of all the maize blocks to the rice chromosomes.

*Block view for a chromosome.* Rice-10 was selected from the above view, which displays this close-up of the blocks.

*Java 2D of duplicated regions on the same chromosome.* The blocks were selected from the above 'Compare', resulting in this view. The block on the left is from the lower part of maize-1 and the block on the right is from the top of maize-1.

(B) Block view and sub-views.

# Search Annotations

[Home](#)

Enter a search term and/or sequence base-pair coordinates (for all chromosomes) and click "Go" to search all annotations for the species selected on the right.

**Search annotations:**

AND/OR

**Enter coordinates:**  to

Go

**Selected Species/Chromosomes:**

☒ Maize v2.0 

All

☒ Rice 

All

☒ Sorghum 

All

For example, the table below lists the first gene annotation from each selected project. Click **Match** to show matching gene sequences in the other species.

3 results

| Type | Location                | Description                                                                                                                                      |                       |
|------|-------------------------|--------------------------------------------------------------------------------------------------------------------------------------------------|-----------------------|
| gene | Sorghum Chr 1 2164:2829 | ID=Sb01g000200<br>Description=similar to Putative uncharacterized protein                                                                        | <a href="#">Match</a> |
| gene | Maize v2.0 Chr 1 3:3807 | ID=GRMZM2G060082<br>Name=GRMZM2G060082<br>biotype=transposable_element<br><a href="#">FLcDNA_M_BT019099</a><br><a href="#">FLcDNA_F_EU955706</a> | <a href="#">Match</a> |
| gene | Rice Chr 1 1903:9817    | ID=13101.t00001<br>Name=TBC domain containing protein, expressed<br>Alias=LOC_Os01g01010                                                         | <a href="#">Match</a> |

First | Previous 10 | Page 1 of 1 | Next 10 | Last

*Search annotation and location.* This searches all text from the attribute field of the GFF files; consequently, it is not dependent on which attributes have been set. Selecting ‘Match’ displays all (if any) anchors associated with the gene.

3 results

| Type | Location                           | Description                                                                                        |                      |
|------|------------------------------------|----------------------------------------------------------------------------------------------------|----------------------|
| gene | Rice Chr 1 43224815:43229696       | ID=13101.t06678<br>Name=mitochondrial carrier protein, putative, expressed<br>Alias=LOC_Os01g74640 | <a href="#">View</a> |
| gene | Sorghum Chr 3 9999916:10005657     | ID=Sb03g009250<br>Description=similar to Putative GTPase-activating protein                        | <a href="#">View</a> |
| gene | Maize v2.0 Chr 3 33555936:33562508 | ID=GRMZM2G031043<br>Name=GRMZM2G031043<br>biotype=protein_coding                                   | <a href="#">View</a> |

First | Previous 10 | Page 1 of 1 | Next 10 | Last

*Match view.* The result of selecting the second ‘Match’ from the table. Selecting View shows the region in the Java 2D display.

(C) Gene Search and Match.

## Summary for Maize v2.0 to Rice

### Hits

33792 hits  
23237 in syntenic blocks

### Syntenic Coverage

| Genome     | Coverage | Double-coverage |
|------------|----------|-----------------|
| Maize v2.0 | 95%      | 60%             |
| Rice       | 97%      | 91%             |

### Block sizes

| Genome     | < 1Mb | 1 Mb - 3 Mb | > 3 Mb |
|------------|-------|-------------|--------|
| Maize v2.0 | 16    | 29          | 144    |
| Rice       | 47    | 36          | 106    |

### Maize v2.0 Annotation

| Type | Number | Length (Mb) |
|------|--------|-------------|
| exon | 487152 | 13.9        |
| gene | 110200 | 24.6        |

### Rice Annotation

| Type | Number | Length (Mb) |
|------|--------|-------------|
| exon | 301164 | 9           |
| gene | 57624  | 16.8        |

### Anchor filtering and loading

AG = annotated gene; UC = un-annotated cluster (i.e. raw hit does not overlap a gene annotation)

|          | <i>MUMmer</i><br><u>Raw Hits</u> | <i>Clustered</i><br><u>Anchors</u> | <i>Filtered</i><br><u>Anchors</u> | <i>Syntenic</i><br><u>Anchors</u> | <i>Filtered</i><br><u>Raw Hits</u> |
|----------|----------------------------------|------------------------------------|-----------------------------------|-----------------------------------|------------------------------------|
| AG-to-AG | 197569                           | 97853                              | 31472                             | 22410                             | 98544                              |
| AG-to-UC | 23046                            | 18409                              | 1699                              | 645                               | 3272                               |
| UC-to-UC | 5968                             | 5571                               | 621                               | 182                               | 757                                |
| Total    | 226583                           | 121833                             | 33792                             | 23237                             | 102573                             |

### Blocks

| ▲<br>▼ Chr1 | ▲<br>▼ Chr2 | ▲ Block<br>▼ # | ▲ size1<br>▼ | ▲ size2<br>▼ | ▲ #hits<br>▼ | ▲ hits/Mb<br>▼ #1 | ▲ hits/Mb<br>▼ #2 | ▲ Avg.<br>▼ %<br>id |                      |
|-------------|-------------|----------------|--------------|--------------|--------------|-------------------|-------------------|---------------------|----------------------|
| 1           | 3           | 1              | 78814361     | 19226657     | 1154         | 14                | 60                | 88                  | <a href="#">View</a> |
| 1           | 3           | 2              | 55482981     | 15833318     | 862          | 15                | 54                | 88                  | <a href="#">View</a> |
| 1           | 3           | 3              | 20352353     | 3503261      | 28           | 1                 | 7                 | 87                  | <a href="#">View</a> |
| 1           | 3           | 4              | 432156       | 89396        | 7            | 16                | 78                | 87                  | <a href="#">View</a> |

(D) Summary table. Selecting 'View' displays the corresponding syntenic block in the Java 2D view.

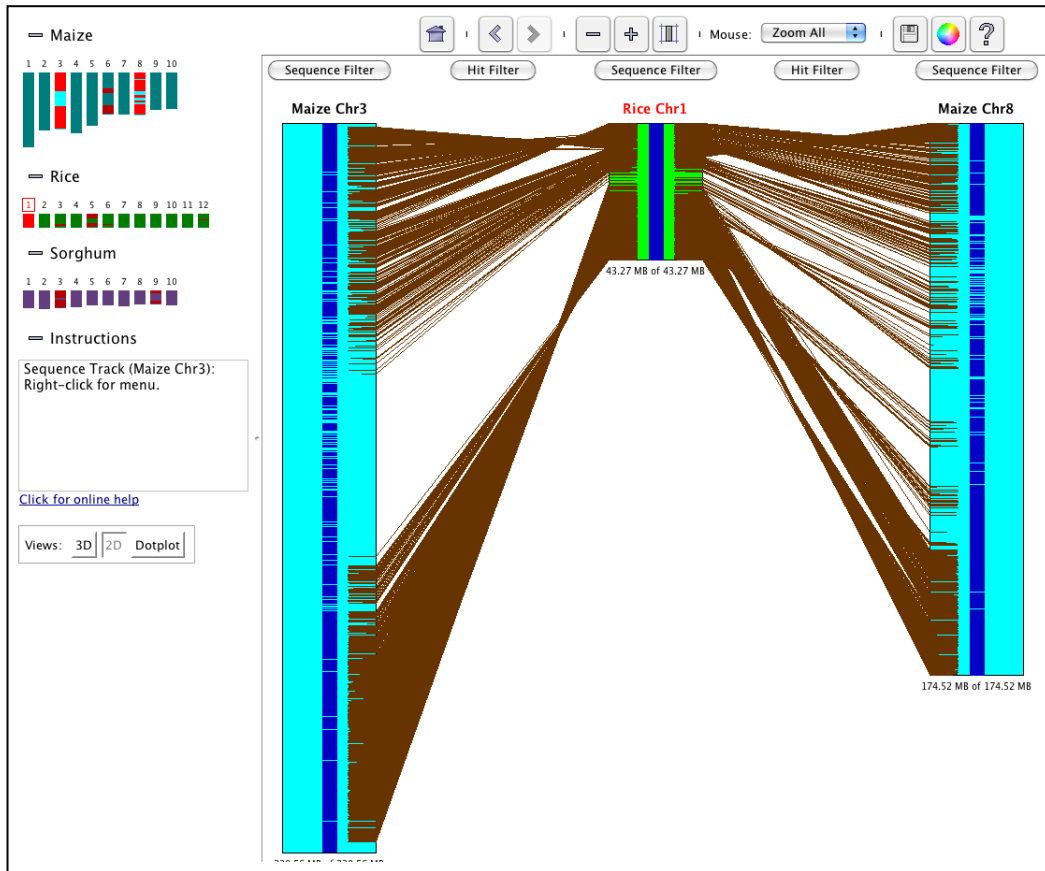

**Figure S3: Drawn to scale.** This is the same as Figure 3A, but drawn to scale by selecting the SyMAP scale button (next to the + at the top)
